# Supplementary material for: Targeting of an antecedent proteinase by an activatable probe with deep tissue penetration facilitates early visualization and dynamic malignancy evaluation of orthotopic pancreatic ductal adenocarcinoma (PDAC)
Source: Royal Society of Chemistry journal article supplement (doi:10.1039/c9bm00441f), 2019-01-01
Supplement: c9bm00441f1.pdf [file c9bm00441f1.pdf]

## Supplementary File 1

Synthetic procedures were as follow:

### 1. The modification of IR780.

**1.1 IR780p:** Piperazine (50 mg) was added to a degassed solution of the commercial IR780 probe (IR780, 45 mg) in anhydrous DMF (5 mL). The mixture was heated at 80 °C under magnetic stirring and protection from light under an argon atmosphere for 6 h. The crude product was purified by HPLC and then lyophilized to obtain a solid product (IR780p, 70% yield, Mw=589.43, Figure S1). The purification condition of HPLC was as followed:  $V_{\text{MeOH}} : V_{\text{water}} = 50 : 50$ , 1 mL/min, Thermo C18 HPLC (250 mm x 4.6 mm, 5  $\mu\text{m}$ ).

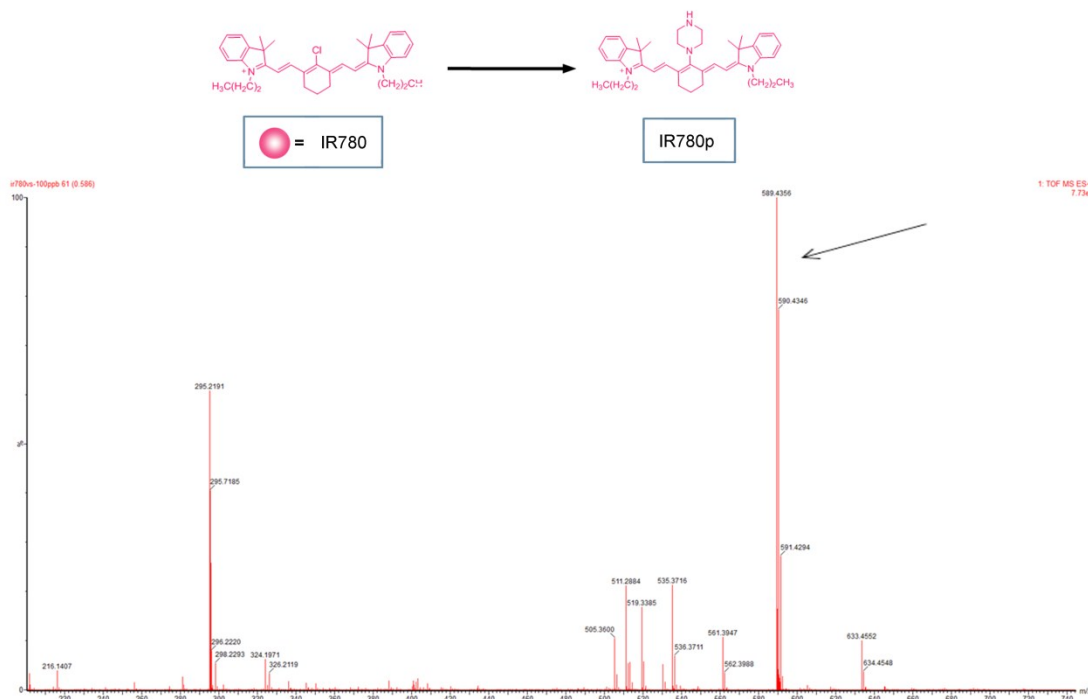

**Figure S1.** Mass Spectrometry (MS) of IR780p

**1.2 IR780pVS:** DVS (50 mg) was added to a solution of IR780p (35 mg) and Et<sub>3</sub>N (0.01 mL) in CH<sub>2</sub>Cl<sub>2</sub>-MeOH (2:1, 5 mL). The crude product was purified by HPLC and then lyophilized to obtain a solid product (named **IR780pvs**, 42.3% yield, Mw=785.41, Figure S2A). The purification condition was the same as above.

$^1\text{H}$  NMR (600 MHz,  $\text{CDCl}_3$ ) (Figure S2B):  $\delta$  7.65 (d,  $J = 13.2$  Hz, 1H), 7.35 (brd,  $J = 7.8$  Hz, 2H), 7.32 (brd,  $J = 7.8$ , 2H), 7.20 (d,  $J = 2.4$  Hz, 1H), 7.16 (d,  $J = 2.4$  Hz, 1H), 7.12 (brs, 1H), 7.14 (d,  $J = 7.8$ Hz, 2H), 6.96 (d,  $J = 7.8$ Hz, 2H), 5.77 (d,  $J = 13.2$  Hz, 1H), 5.15 (m, 2H), 4.00 (m, 2H), 3.89 (m, 2H), 3.27 (m, 2H), 2.93 (m, 2H), 2.70-2.50 (m, 4H), 2.48 (m, 4H), 2.06 (m, 2H), 1.87 (m, 4H), 1.68 (s, 6H), 1.42 (s, 6H), 1.07 (t,  $J = 7.2$  Hz, 6H)

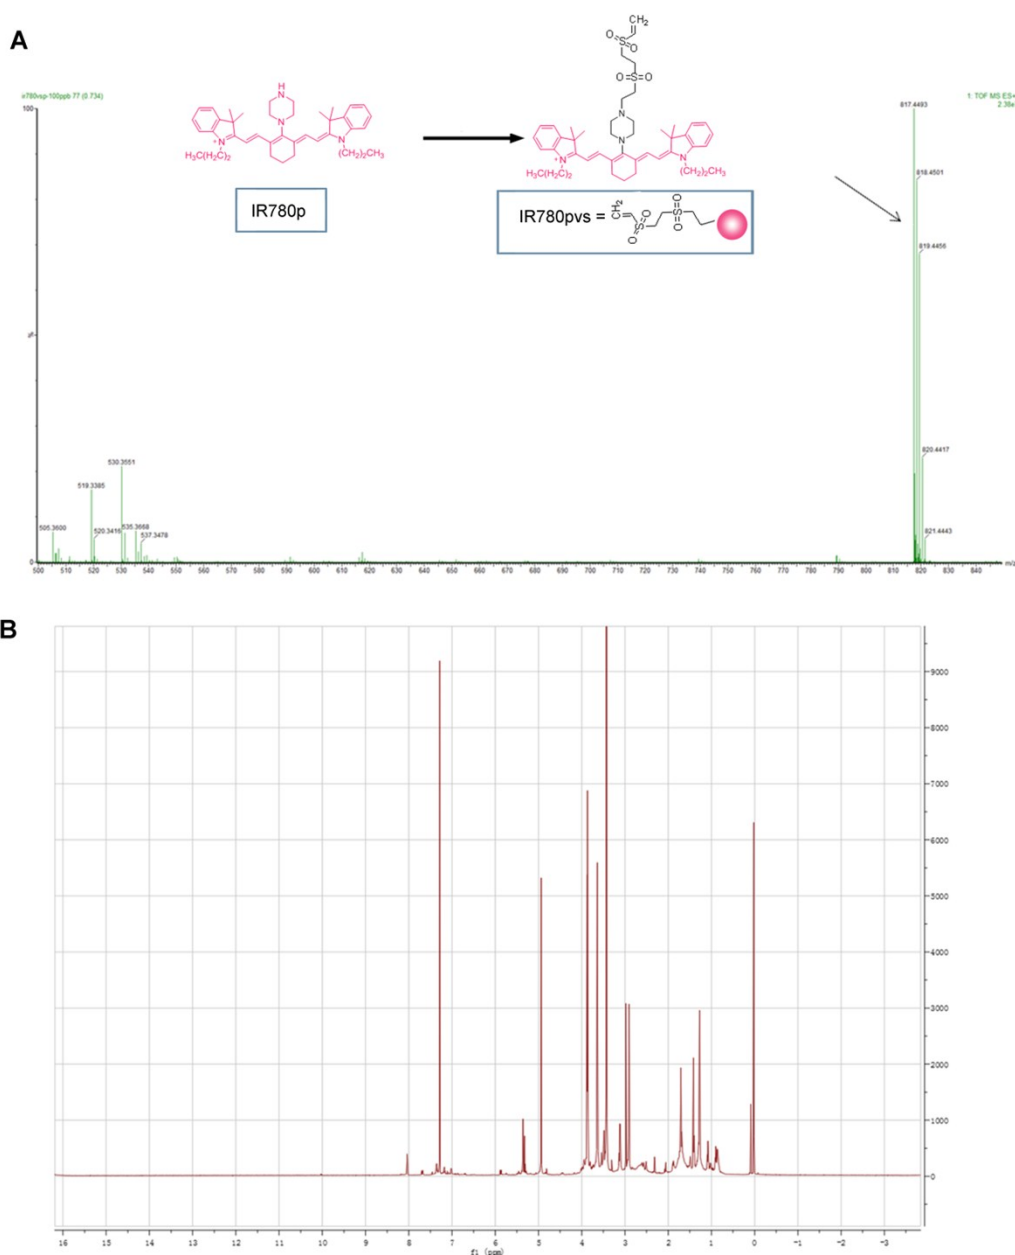

**Figure S2.** Mass Spectrometry (MS) (A) and  $^1\text{H}$  NMR (B) of IR780pVS

2. **Synthesis of I<sub>780</sub>P.** 5 mg of protective peptide GPLGVRGKGG (**P**) was dissolved in anhydrous DMF, and then 7 mg of IR780pvs (**I<sub>780</sub>**) was added, the mixture was stirred under protection from light for 16 h at room temperature. The synthesized peptide was purified by reversed-phase high-performance liquid chromatography (RP-HPLC) on a 18 semipreparative column using a 10 to 100% linear gradient of acetonitrile/water mixture (0.1% trifluoroacetic acid) for 30 min at a low rate of 1 mL/min and lyophilized. The freeze-dried production (M<sub>w</sub>=2037.11, 20.14% yield, Figure S3A) was then deprotected by reaction in 90% TFA dichlorochloride for 1 h and was precipitated by adding ice ethylether. After that, the production peptide-IR780 (**I<sub>780</sub>P**, M<sub>w</sub>=1682.96, Figure S3B) was steamed by rotary evaporator and dried by vacuum drying oven.

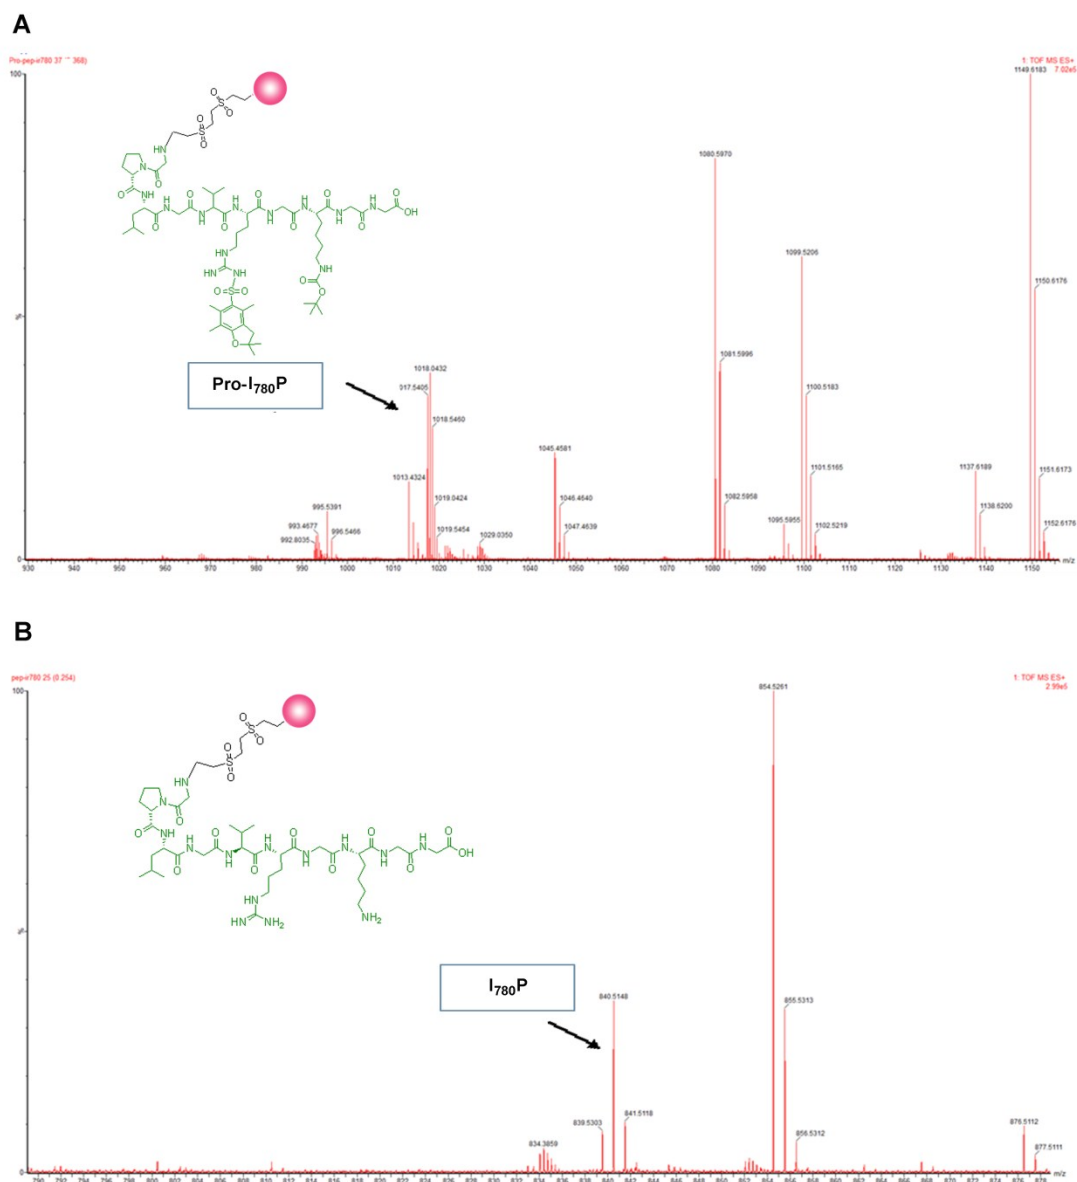

**Figure S3.** Mass Spectrometry (MS) of Pro-I<sub>780</sub>P (A) and I<sub>780</sub>P (B)

**3 Synthesis of I<sub>780</sub>BP.** Peptide-IR780 (I<sub>780</sub>P, 5 mg) and BHQ-3 (1.5 mg) were respectively dissolved in 200  $\mu$ l of anhydrous DMF, and then respectively were added 12  $\mu$ l of DIPEA and mixed for 10 minutes at room temperature. At last, the mixture containing BHQ-3 solution was added into Peptide-IR780 solution and protected from light for 4 h, and the production I<sub>780</sub>BP (Mw=2213.24, 17.23% yield, Figure S4) purified by HPLC. The purification conditions were the same with the peptide.

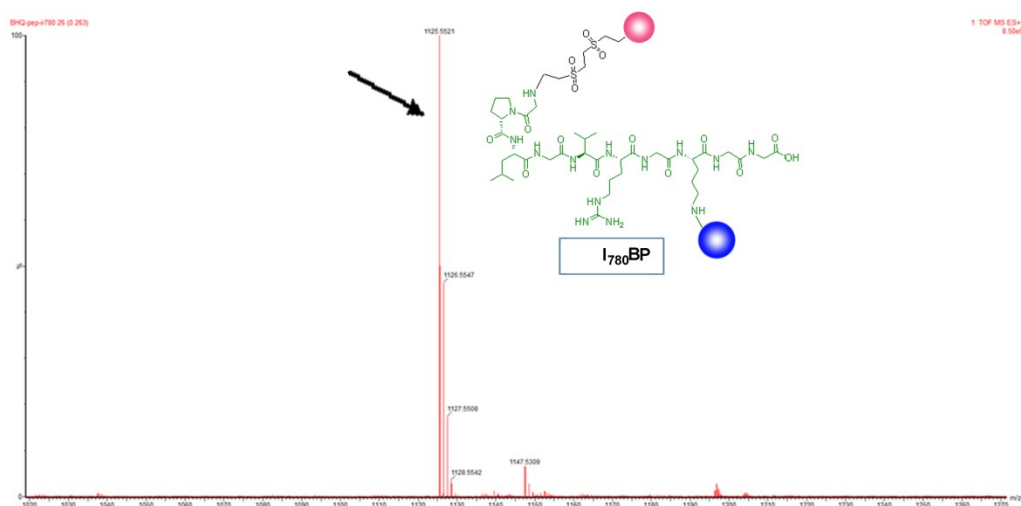

**Figure S4.** Mass Spectrometry (MS) of I<sub>780</sub>BP

**4 Synthesis of I<sub>780</sub>BP-PEG12.** BHQ-3-Peptide-IR780 (I<sub>780</sub>BP, 3 mg) was dissolved in 400  $\mu$ l of DMF/water (v:v=1:1). Then EDC (0.26mg) and NHS (0.16mg) were added into the mixture and activated for 30 minutes, and then 2 mg of NH<sub>2</sub>-PEG12-NH<sub>2</sub> was added in reaction system, then reacted under protection from light for 24 h at room temperature and the production I<sub>780</sub>BP-PEG12 (M<sub>w</sub>=2827.42, Figure S5) was purified by HPLC. The purification conditions were the same with the peptide.

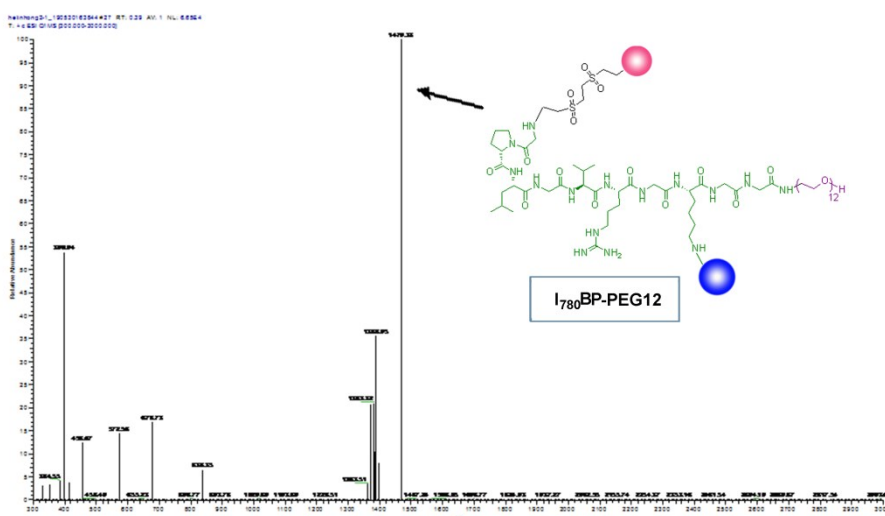

**Figure S5** Mass Spectrometry (MS) of I<sub>780</sub>BP-PEG12
